# Supplementary material for: Assembly of metal–organic frameworks based on 4-connected 3,3′,5,5′-azobenzenetetracarboxylic acid: structures, magnetic properties, and sensing of Fe3+ ions
Source: Royal Society of Chemistry journal article supplement (doi:10.1039/c8nj05139a), 2019-01-01
Supplement: c8nj05139a1.pdf [file c8nj05139a1.pdf]

## Electronic Supplementary Information

### **Assembly of Metal Organic Frameworks Based on 4-connected 3,3',5,5'-Azobenzenetetracarboxylic Acid: Structures, Magnetic Properties, and Sensing Fe<sup>3+</sup> ions**

**Min Di, Jingwen Shen, Zheng Cui, Xiaoying Zhang,\* and Jingping Zhang\***

Advanced Energy Materials Research Center  
Faculty of Chemistry, Northeast Normal University  
Changchun 130024, P. R. China  
† E-mail: zhangxy218@nenu.edu.cn; jpzhang@nenu.edu.cn.

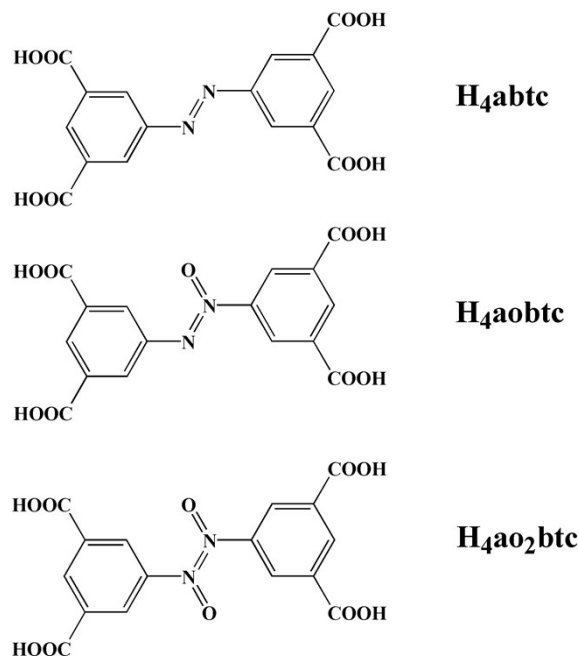

**Scheme S1** The structure of H<sub>4</sub>abtc and its two oxidized forms.

**Table S1.** Selected bond distances (Å) and bond angles (°) for complex 1.

|                    |          |                     |            |              |          |
|--------------------|----------|---------------------|------------|--------------|----------|
| Co(1)-O(1)         | 2.118(6) | Co(1)-O(10)         | 2.074(6)   | Co(2)-O(5)#1 | 2.015(5) |
| Co(1)-O(3)         | 2.057(5) | Co(1)-O(11)         | 2.109(7)   | Co(2)-O(6)   | 2.339(6) |
| Co(1)-O(4)#1       | 2.030(6) | Co(2)-O(1)          | 2.135(5)   | Co(2)-O(7)#2 | 2.052(5) |
| Co(1)-O(9)         | 2.095(7) | Co(2)-O(2)          | 2.005(5)   | Co(2)-O(8)#2 | 2.339(6) |
| O(3)-Co(1)-O(1)    | 92.5(2)  | O(1)-Co(2)-O(6)     | 58.50(19)  |              |          |
| O(3)-Co(1)-O(9)    | 89.3(3)  | O(1)-Co(2)-O(8)#2   | 93.0(2)    |              |          |
| O(3)-Co(1)-O(10)   | 173.5(3) | O(2)-Co(2)-O(1)     | 104.5(2)   |              |          |
| O(3)-Co(1)-O(11)   | 83.9(3)  | O(2)-Co(2)-O(5)#1   | 97.2(3)    |              |          |
| O(4)#1-Co(1)-O(1)  | 89.2(2)  | O(2)-Co(2)-O(6)     | 92.1(3)    |              |          |
| O(4)#1-Co(1)-O(3)  | 95.0(3)  | O(2)-Co(2)-O(7)#2   | 98.5(2)    |              |          |
| O(4)#1-Co(1)-O(9)  | 174.9(3) | O(2)-Co(2)-O(8)#2   | 158.21(19) |              |          |
| O(4)#1-Co(1)-O(10) | 86.3(3)  | O(5)#1-Co(2)-O(1)   | 102.0(2)   |              |          |
| O(4)#1-Co(1)-O(11) | 91.2(3)  | O(5)#1-Co(2)-O(6)   | 160.1(2)   |              |          |
| O(9)-Co(1)-O(1)    | 93.3(3)  | O(5)#1-Co(2)-O(7)#2 | 103.7(2)   |              |          |
| O(9)-Co(1)-O(11)   | 86.6(3)  | O(5)#1-Co(2)-O(8)#2 | 91.6(2)    |              |          |
| O(10)-Co(1)-O(1)   | 93.8(2)  | O(6)-Co(2)-O(8)#2   | 86.0(2)    |              |          |
| O(10)-Co(1)-O(9)   | 89.1(3)  | O(7)#2-Co(2)-O(1)   | 142.7(2)   |              |          |
| O(10)-Co(1)-O(11)  | 89.8(3)  | O(7)#2-Co(2)-O(6)   | 92.1(2)    |              |          |
| O(11)-Co(1)-O(1)   | 176.4(2) | O(7)#2-Co(2)-O(8)#2 | 59.9(2)    |              |          |

Symmetry transformations used to generate equivalent atoms:

$$\#1 = x+1/2, -y+3/2, -z+5/4 \quad \#2 = x+1/2, -y+5/2, -z+5/4$$

**Table S2.** Selected bond distances (Å) and bond angles (°) for complex **2**.

|                     |           |                     |            |              |          |
|---------------------|-----------|---------------------|------------|--------------|----------|
| Mn(1)-O(1)          | 2.17(4)   | Mn(1)-O(2)          | 2.1070(8)  | Mn(1)-O(3)   | 2.148(5) |
| Mn(1)-O(1W)         | 2.35(4)   | Mn(1)-O(4)#1        | 2.164(4)   | Mn(1)-O(5)#2 | 2.172(4) |
| Mn(1)-O(6)#3        | 2.175(4)  | Mn(2)-O(7)          | 2.24(2)    |              |          |
| O(2)-Mn(1)-O(1)     | 178.1(9)  | O(2)-Mn(1)-O(1W)    | 170.6(8)   |              |          |
| O(2)-Mn(1)-O(3)     | 87.6(2)   | O(2)-Mn(1)-O(4)#1   | 94.66(17)  |              |          |
| O(2)-Mn(1)-O(5)#2   | 94.22(17) | O(2)-Mn(1)-O(6)#3   | 88.5(13)   |              |          |
| O(1)-Mn(1)-O(3)     | 94.3(9)   | O(1)-Mn(1)-O(4)#1   | 85.5(13)   |              |          |
| O(1)-Mn(1)-O(5)#2   | 85.7(13)  | O(1)-Mn(1)-O(6)#3   | 89.6(9)    |              |          |
| O(3)-Mn(1)-O(1W)    | 101.3(9)  | O(3)-Mn(1)-O(4)#1   | 87.5(2)    |              |          |
| O(3)-Mn(1)-O(5)#2   | 90.1(2)   | O(3)-Mn(1)-O(6)#3   | 176.07(19) |              |          |
| O(4)#1-Mn(1)-O(1W)  | 88.9(12)  | O(4)#1-Mn(1)-O(5)#2 | 170.71(16) |              |          |
| O(4)#1-Mn(1)-O(5)#2 | 92.63(19) | O(5)#2-Mn(1)-O(1W)  | 82.7(12)   |              |          |
| O(5)#2-Mn(1)-O(6)#3 | 90.34(18) | O(6)#3-Mn(1)-O(1W)  | 82.6(9)    |              |          |

Symmetry transformations used to generate equivalent atoms:

$$\#1 = 1-z, x, 1-y \quad \#2 = 3/2-x, 3/2-z, y-1/2 \quad \#3 = 3/2-y, 3/2-x, z-1/2$$

**Table S3.** Selected bond distances (Å) and bond angles (°) for complex **3**.

|                      |            |                      |            |               |           |
|----------------------|------------|----------------------|------------|---------------|-----------|
| Zn(1)-Zn(2)          | 3.0030(13) | Zn(2)-O(3)           | 2.009(9)   | Zn(3)-O(7)    | 1.98(3)   |
| Zn(1)-O(1)           | 2.046(8)   | Zn(2)-O(9)#1         | 2.002(9)   | Zn(3)-O(10)#4 | 2.017(7)  |
| Zn(1)-O(4)           | 2.035(7)   | Zn(2)-O(12)#2        | 1.999(9)   | Zn(3)-O(11)#5 | 2.017(7)  |
| Zn(1)-O(8)#1         | 2.052(7)   | Zn(2)-O(13)          | 1.939(8)   | Zn(3)-O(6A)   | 2.06(2)   |
| Zn(1)-O(14)#2        | 2.011(8)   | Zn(3)-Zn(3)#3        | 3.0058(17) | Zn(3)-O(5A)#3 | 1.942(18) |
| Zn(1)-O(15)          | 2.003(6)   | Zn(3)-O(5)#3         | 2.06(3)    | Zn(3)-O(7A)   | 1.999(19) |
| Zn(2)-O(2)           | 2.025(10)  | Zn(3)-O(6)           | 1.986(19)  |               |           |
| O(1)-Zn(1)-Zn(2)     | 74.4(2)    | O(2)-Zn(2)-Zn(1)     | 83.6(2)    |               |           |
| O(1)-Zn(1)-O(8)#1    | 85.9(4)    | O(3)-Zn(2)-Zn(1)     | 75.2(3)    |               |           |
| O(4)-Zn(1)-Zn(2)     | 83.9(2)    | O(3)-Zn(2)-O(2)      | 158.4(4)   |               |           |
| O(4)-Zn(1)-O(1)      | 158.1(3)   | O(9)#1-Zn(2)-Zn(1)   | 87.2(2)    |               |           |
| O(4)-Zn(1)-O(8)#1    | 89.8(3)    | O(9)#1-Zn(2)-O(2)    | 86.5(5)    |               |           |
| O(8)#1-Zn(1)-Zn(2)   | 70.8(2)    | O(9)#1-Zn(2)-O(3)    | 88.4(4)    |               |           |
| O(14)#2-Zn(1)-Zn(2)  | 86.8(2)    | O(12)#2-Zn(2)-Zn(1)  | 70.8(2)    |               |           |
| O(14)#2-Zn(1)-O(1)   | 89.3(4)    | O(12)#2-Zn(2)-O(2)   | 90.1(5)    |               |           |
| O(14)#2-Zn(1)-O(4)   | 86.6(4)    | O(12)#2-Zn(2)-O(3)   | 86.8(4)    |               |           |
| O(14)#2-Zn(1)-O(8)#1 | 157.6(3)   | O(12)#2-Zn(2)-O(9)#1 | 157.9(3)   |               |           |

|                       |           |                       |           |
|-----------------------|-----------|-----------------------|-----------|
| O(15)-Zn(1)-Zn(2)     | 166.4(2)  | O(13)-Zn(2)-Zn(1)     | 167.2(3)  |
| O(15)-Zn(1)-O(1)      | 99.2(3)   | O(13)-Zn(2)-O(2)      | 103.7(4)  |
| O(15)-Zn(1)-O(4)      | 102.6(3)  | O(13)-Zn(2)-O(3)      | 97.9(4)   |
| O(15)-Zn(1)-O(8)#1    | 97.1(3)   | O(13)-Zn(2)-O(9)#1    | 103.5(4)  |
| O(15)-Zn(1)-O(14)#2   | 105.3(3)  | O(13)-Zn(2)-O(12)#2   | 98.5(4)   |
| O(5)#3-Zn(3)-Zn(3)#3  | 76.2(7)   | O(11)#5-Zn(3)-O(5)#3  | 156.3(8)  |
| O(6)-Zn(3)-Zn(3)#3    | 81.7(6)   | O(11)#5-Zn(3)-O(10)#4 | 89.9(4)   |
| O(6)-Zn(3)-O(5)#3     | 89.7(12)  | O(11)#5-Zn(3)-O(6A)   | 88.5(9)   |
| O(6)-Zn(3)-O(10)#4    | 161.4(6)  | O(6A)-Zn(3)-O(5)#3    | 84.7(13)  |
| O(6)-Zn(3)-O(11)#5    | 89.3(7)   | O(5A)#3-Zn(3)-O(5)#3  | 12.7(10)  |
| O(7)-Zn(3)-Zn(3)#3    | 169.1(9)  | O(5A)#3-Zn(3)-O(10)#4 | 88.1(7)   |
| O(7)-Zn(3)-O(5)#3     | 100.5(11) | O(5A)#3-Zn(3)-O(11)#5 | 168.9(6)  |
| O(7)-Zn(3)-O(6)       | 87.9(11)  | O(5A)#3-Zn(3)-O(6A)   | 87.3(11)  |
| O(7)-Zn(3)-O(10)#4    | 110.3(10) | O(5A)#3-Zn(3)-O(7A)   | 104.2(8)  |
| O(7)-Zn(3)-O(11)#5    | 103.1(9)  | O(7A)-Zn(3)-O(5)#3    | 116.2(9)  |
| O(10)#4-Zn(3)-Zn(3)#3 | 79.9(3)   | O(7A)-Zn(3)-O(10)#4   | 92.4(8)   |
| O(10)#4-Zn(3)-O(5)#3  | 83.7(10)  | O(7A)-Zn(3)-O(11)#5   | 86.8(6)   |
| O(10)#4-Zn(3)-O(6A)   | 147.1(6)  | O(7A)-Zn(3)-O(6A)     | 120.3(10) |
| O(11)#5-Zn(3)-Zn(3)#3 | 80.2(3)   |                       |           |

Symmetry transformations used to generate equivalent atoms:

#1 -x+y,-x,z    #2 -x+y+1,-x+1,z    #3 -x,-x+y,-z+1

#4 x-y,-y+1,-z+1    #5 -x+y,-x+1,z

**Table S4.** Bond valence sum calculations for complex **1**.

| Atom | Co <sup>II</sup> | Co <sup>III</sup> |
|------|------------------|-------------------|
| Co1  | <u>2.107</u>     | 2.152             |
| Co2  | <u>1.874</u>     | 1.916             |

**Table S5.** Bond valence sum calculations for complex **2**.

| Atom | Mn <sup>II</sup> | Mn <sup>III</sup> |
|------|------------------|-------------------|
| Mn1  | <u>2.235</u>     | 2.062             |
| Mn2  | <u>1.778</u>     | 1.640             |

## Explanations of Crystal Structure Determination

Complex 1: PLAT910\_ALERT\_3\_B Missing # of FCF Reflection(s) Below Theta (Min).

**Explanation:** Some reflections with high intensities, which made the detector overflow were automatically omitted by the diffractometer. So some reflections were missing.

Complex 3: PLAT341\_ALERT\_3\_B Low Bond Precision on C-C Bonds

**Explanation:** The quality of crystal was not so good and the data were collected under low temperature. Therefore thermal vibration of the C atoms was so high that the precision of the C-C bonds is low.

|                                        |            |
|----------------------------------------|------------|
| PLAT420_ALERT_2_B D-H Without Acceptor | O7 – H7AA  |
| PLAT420_ALERT_2_B D-H Without Acceptor | O7 – H7AB  |
| PLAT420_ALERT_2_B D-H Without Acceptor | O7 – H7A   |
| PLAT420_ALERT_2_B D-H Without Acceptor | O7 – H7B   |
| PLAT420_ALERT_2_B D-H Without Acceptor | O13 – H13A |
| PLAT420_ALERT_2_B D-H Without Acceptor | O13 – H13B |
| PLAT420_ALERT_2_B D-H Without Acceptor | O15 – H15B |

**Explanation:** The coordination compound contained so many hydroxyls. The acceptor of the hydrogen on the O-H couldn't be located because there was no proper atom such as O or N for the hydroxyl to form hydrogen bond in the radius of 3.6 Å.

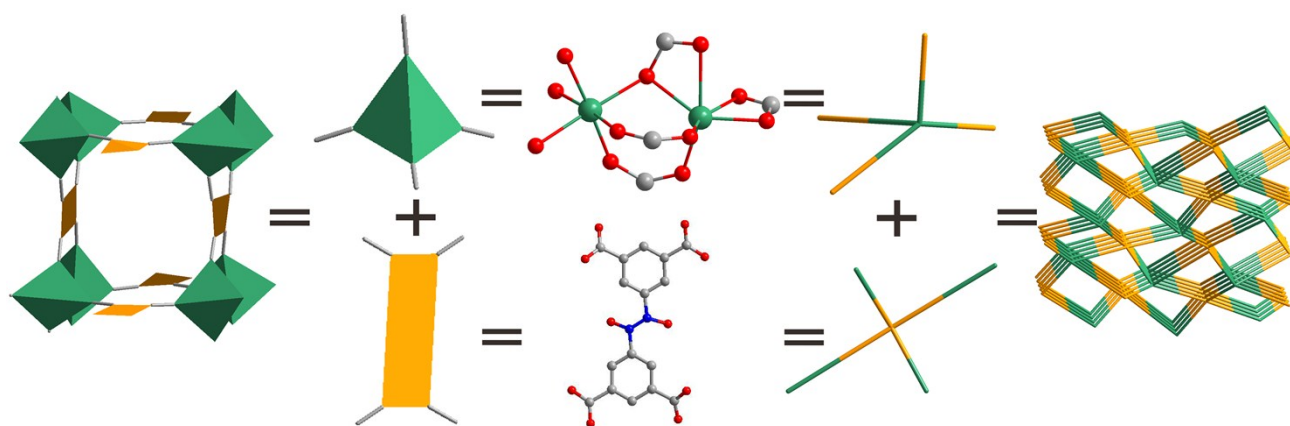

**Fig. S1** A schematic view of the (4, 4)-connected net for PtS-type topology presented by complex 1.

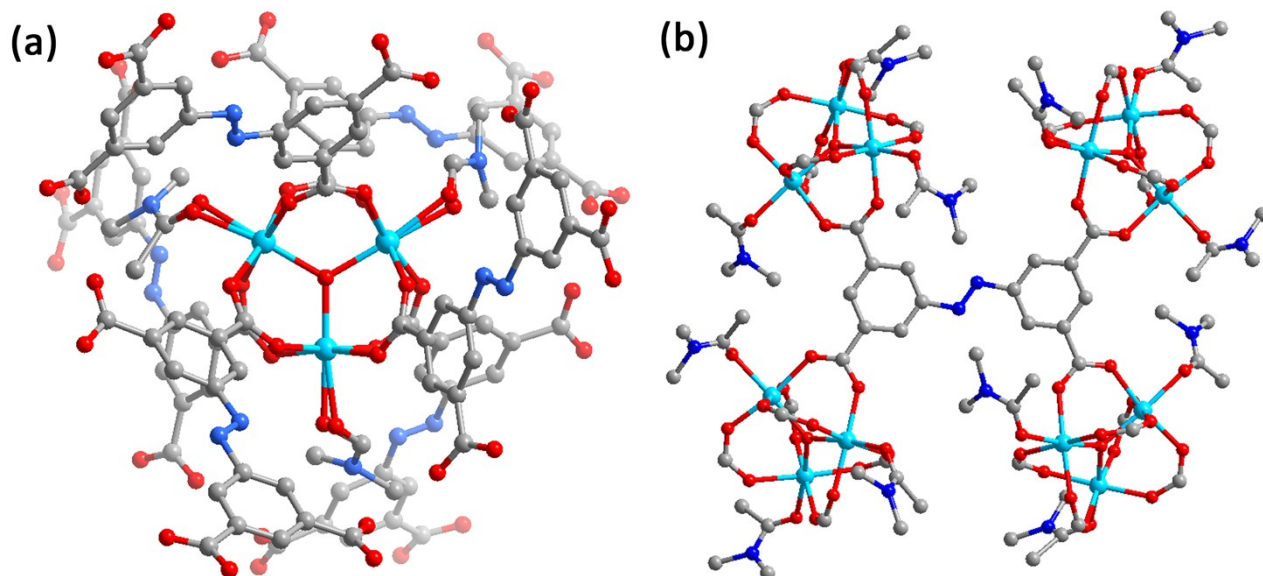

**Fig. S2** (a) The distribution of six  $\text{abtc}^{4+}$  around each  $[\text{Mn}_3\text{OH}(\text{CO}_2)_6]$  SBUs in complex 2; (b) The distribution of four  $[\text{Mn}_3\text{OH}(\text{CO}_2)_6]$  SBUs around each  $\text{abtc}^{4+}$  in complex 2.

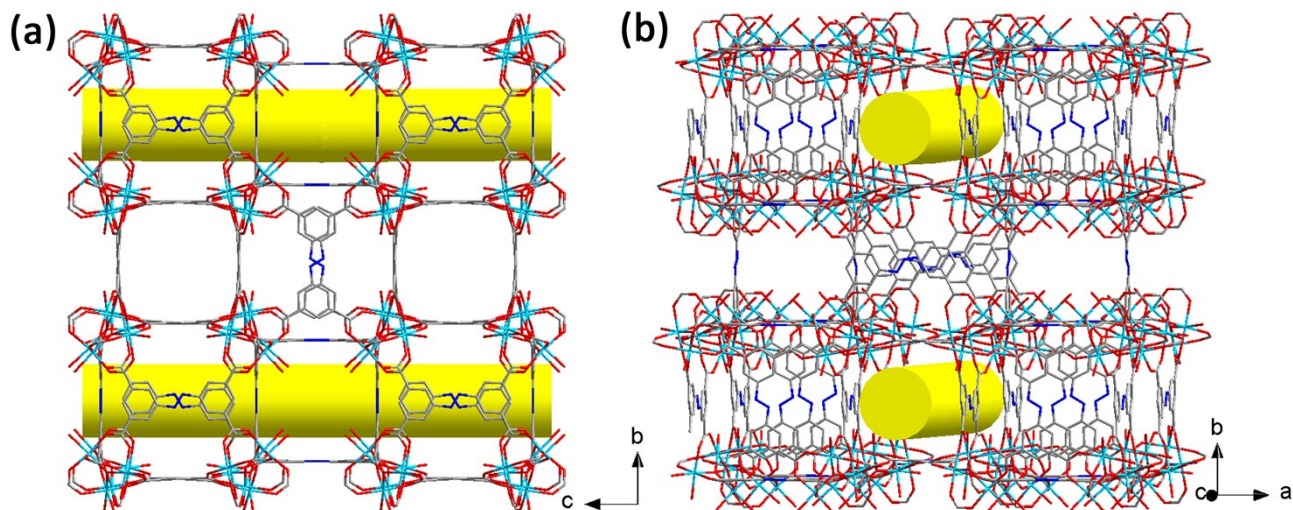

**Fig. S3** The larger channel between the cubic cages along *a*-axis (a) and *c*-axis (b) in complex 2.  $[\text{Mn}(\text{H}_2\text{O})_4]^{2+}$ , H atoms, coordinating DMA and  $\text{H}_2\text{O}$  molecules, and free solvent molecules have been omitted for clarity.

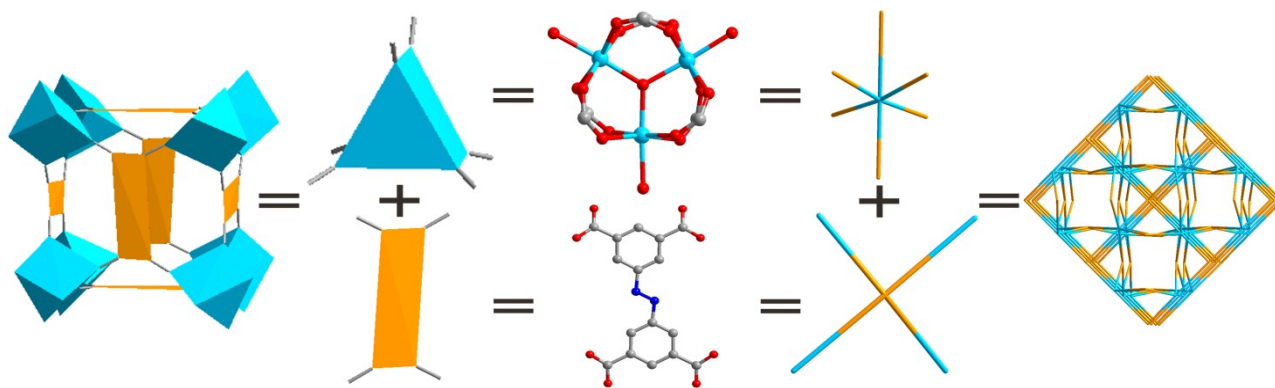

**Fig. S4** A schematic view of the (4,6)-connected net for *soc*-type topology presented by complex 2.

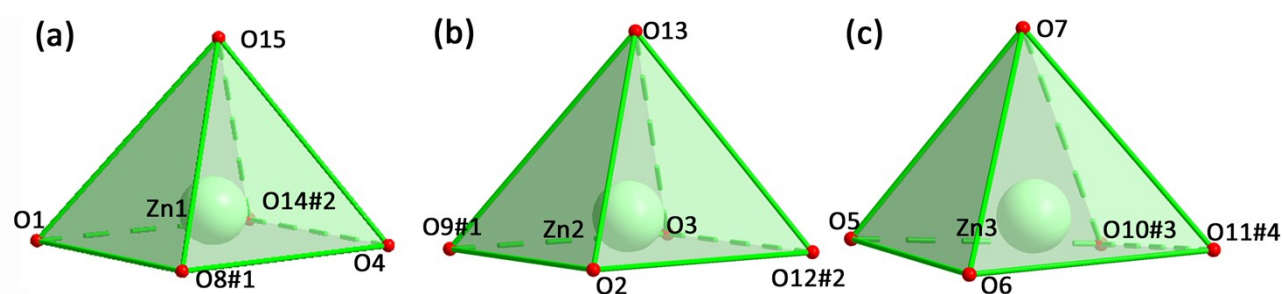

**Fig. S5** The coordination environments of Zn ions in complex 3. Symmetry code: #1:  $-x+y, -x, z$ ; #2:  $1-x+y, 1-x, z$ ; #3:  $x-y, 1-y, 1-z$ ; #4:  $-x+y, 1-x, z$ .

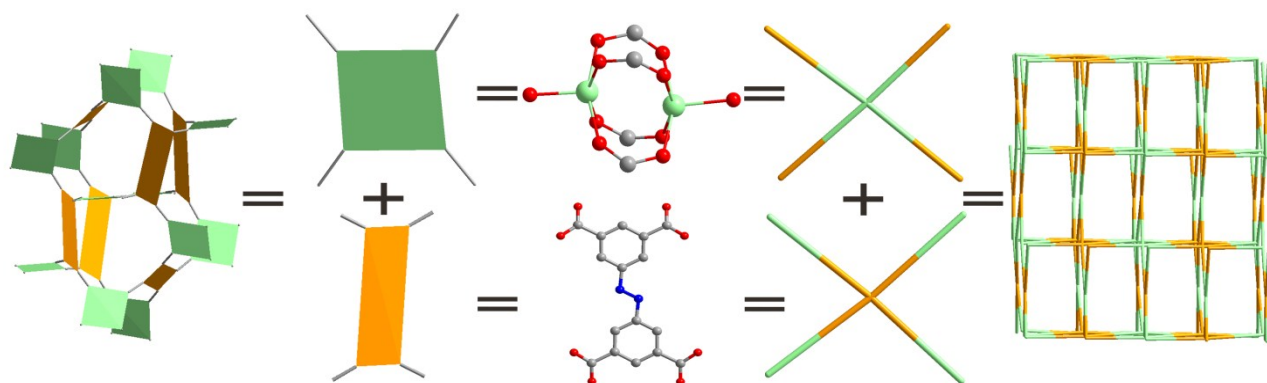

**Fig. S6** A schematic view of the (4,4)-connected net for **NbO**-type topology presented by complex **3**.

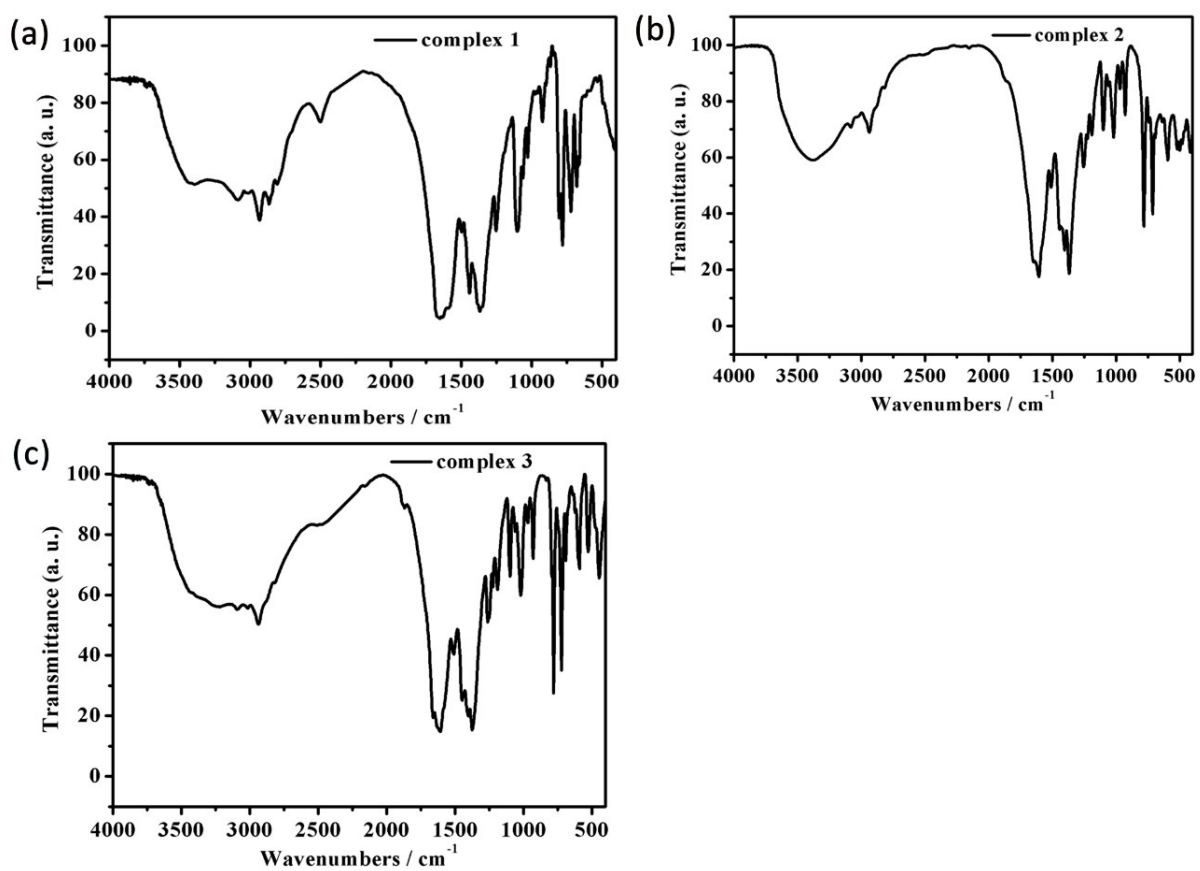

**Fig. S7** IR spectra of **1** a), **2** b), **3** c).



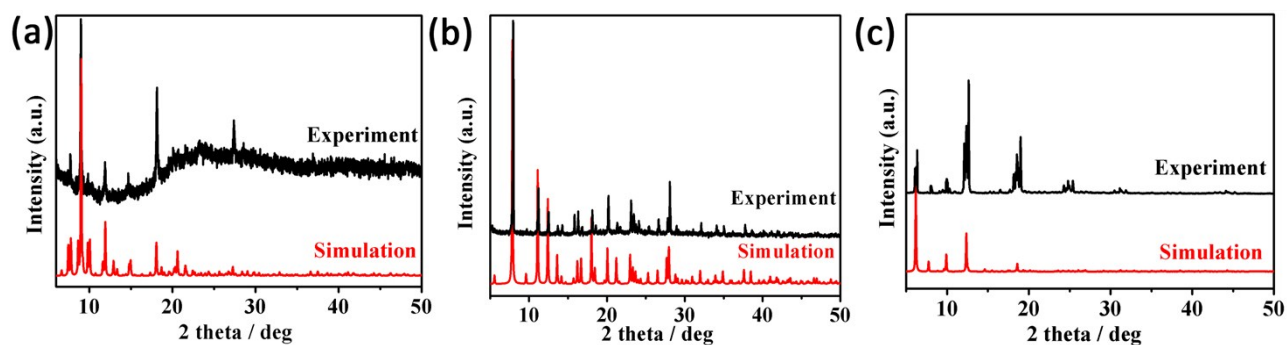

**Fig. S8** Comparison of the simulated and experimental PXRD patterns: 1 a), 2 b), 3 c).

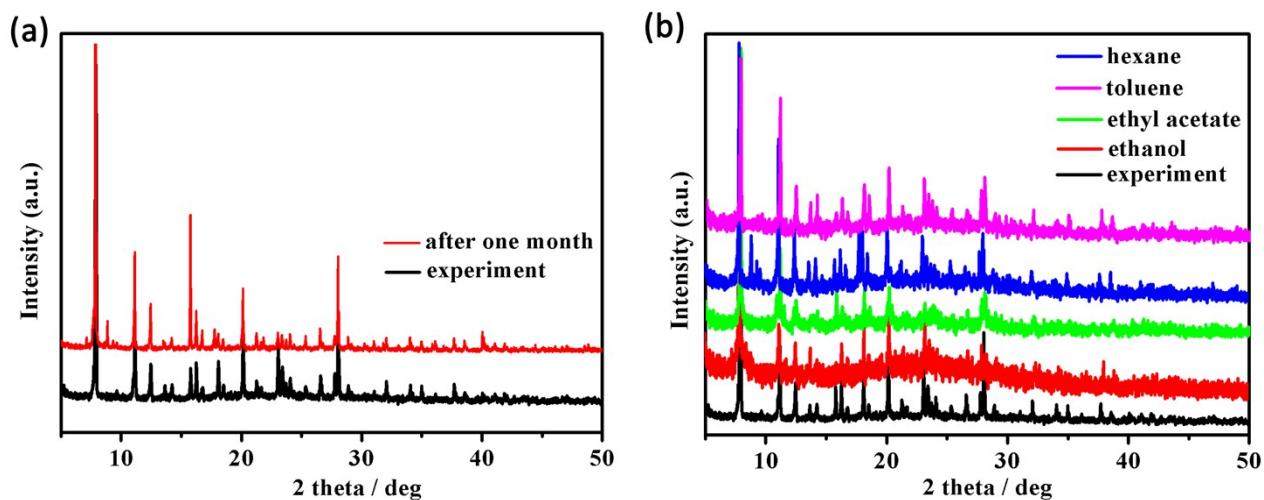

**Fig. S9** (a) Power XRD profiles of **2** after exposing to the air for a month; (b) Power XRD profiles of **2** after being soaked in various boiling solvents for 12 h.

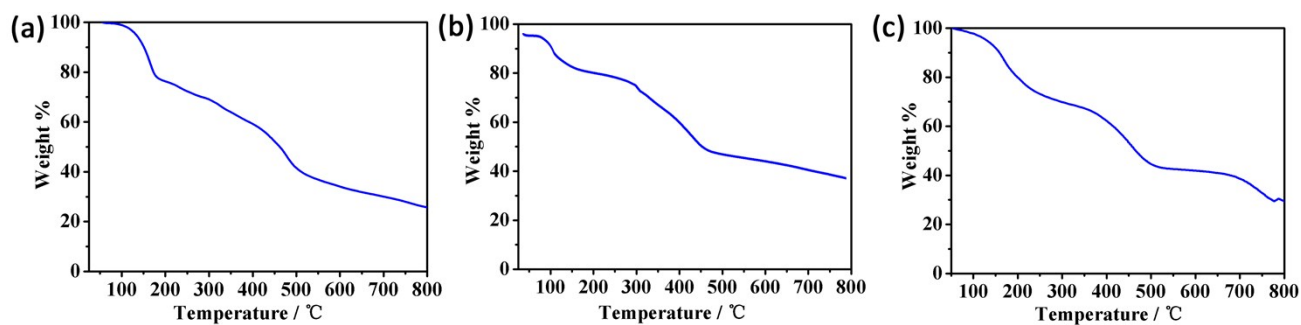

**Fig. S10** The TG curves of **1** a), **2** b), **3** c) on crystalline samples under the  $N_2$  atmosphere in the range of 55–800 °C.

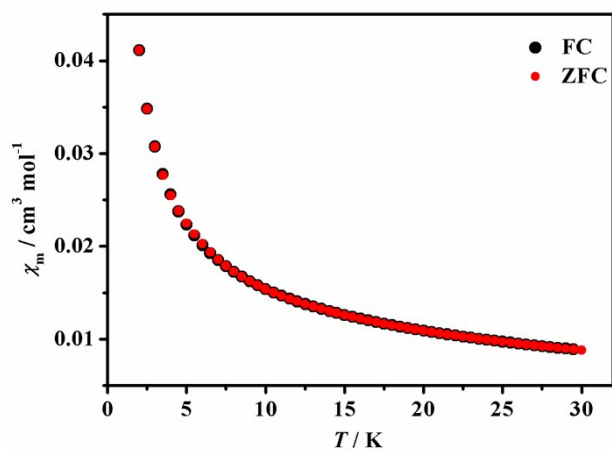

**Figure S11.** The ZFC and FC curves at 50 Oe of **2**.

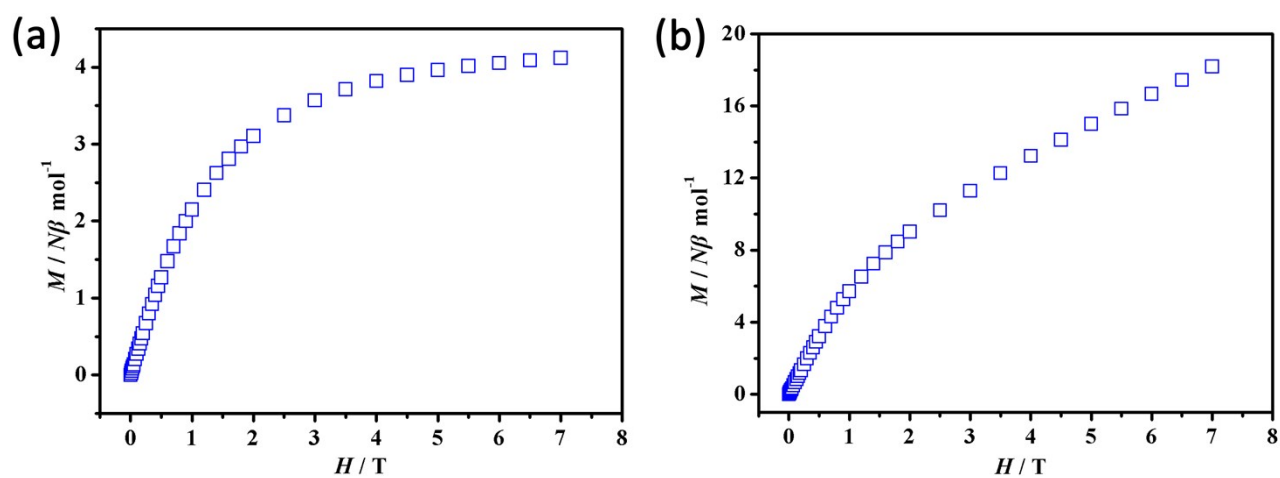

**Fig. S12** Plot of  $M/N\beta$  vs.  $H$  at 2 K for complexes **1 a)**, **2 b)**.

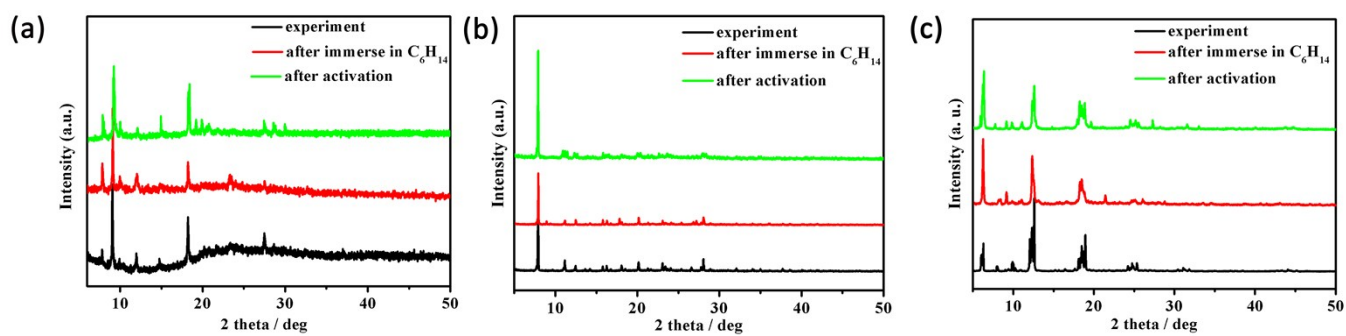

**Fig. S13** Comparison of the experimental and activated PXRD patterns of **1 a)**, **2 a)**, **3 b)**.

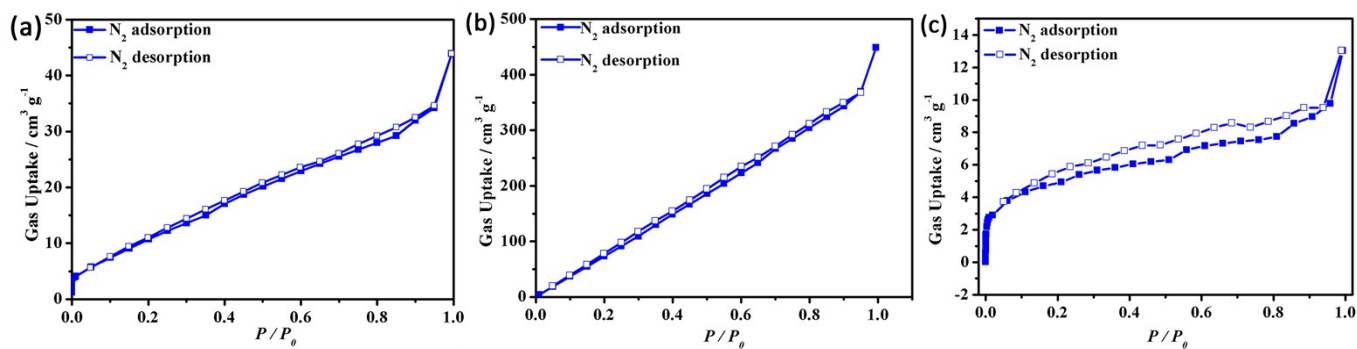

**Fig. S14** Nitrogen sorption isotherm on 1 a), 2 a), 3 b) at 77 K.

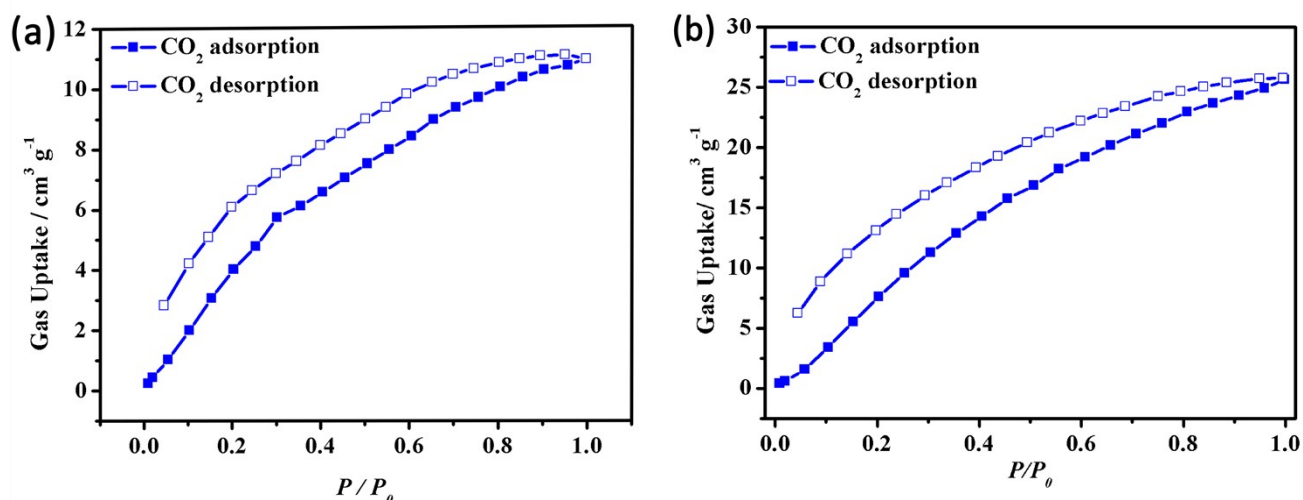

**Fig. S15** Carbon dioxide sorption isotherm on 1 a), 3 b) at 273 K.

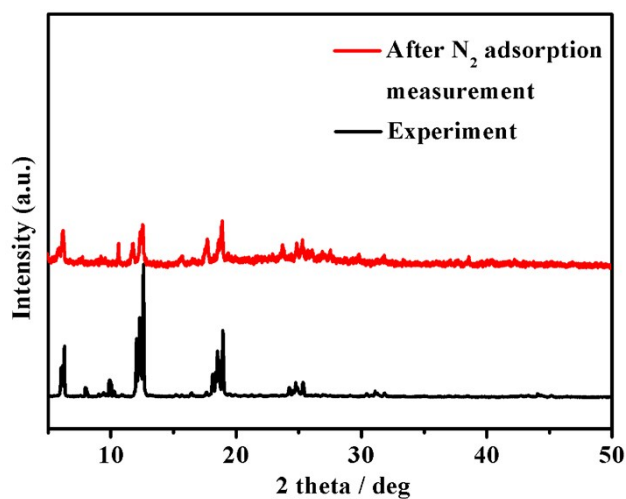

**Fig. S16** The PXRD patterns of the experimental and after N<sub>2</sub> adsorption measurement of 3 .

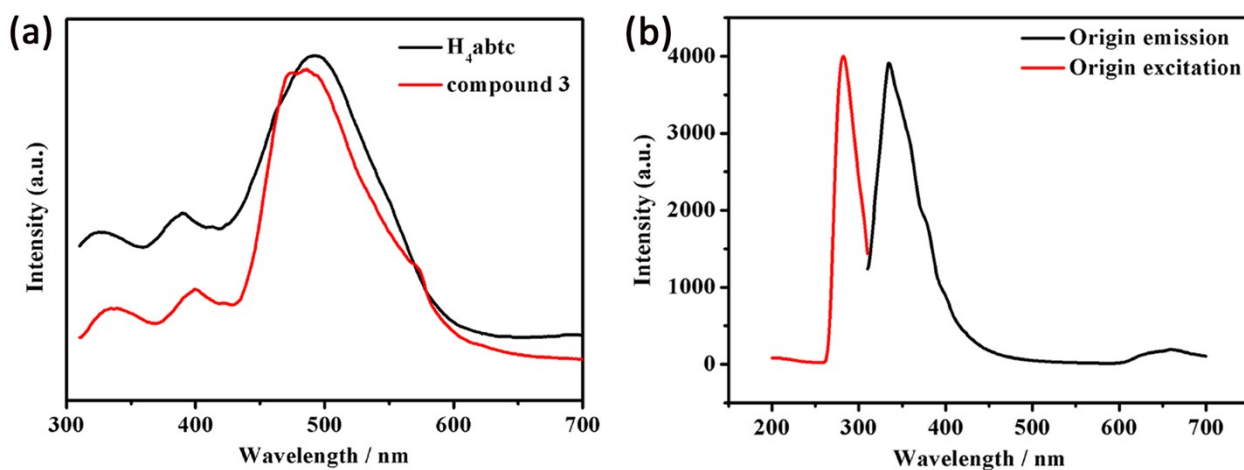

**Fig. S17** (a) Solid-state emission spectrum of  $H_4abtc$  and **3** at room temperature; (b) The excitation (red) and PL spectra (black) of the origin DMF solution of compound **3**, monitored and excited at 335 nm and 282 nm, respectively

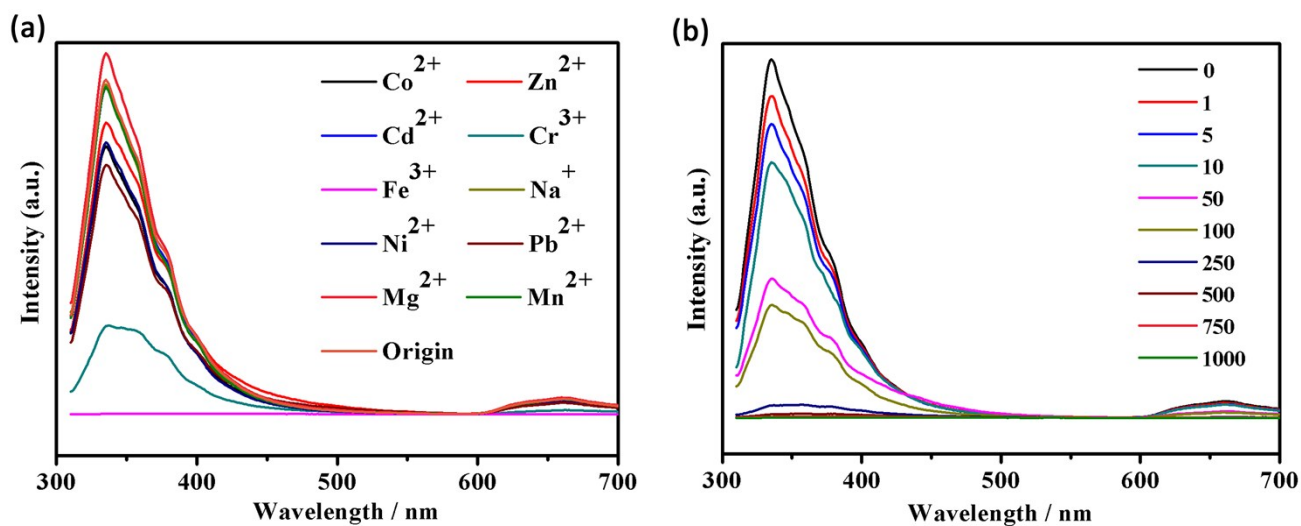

**Fig. S18** (a) Luminescence spectra and of the DMF suspensions of complex **3** with the different metal ions; (b) Luminescence spectra of suspensions the DMF suspensions of complex **3** after adding different volume of  $Fe^{3+}$  ions solutions.

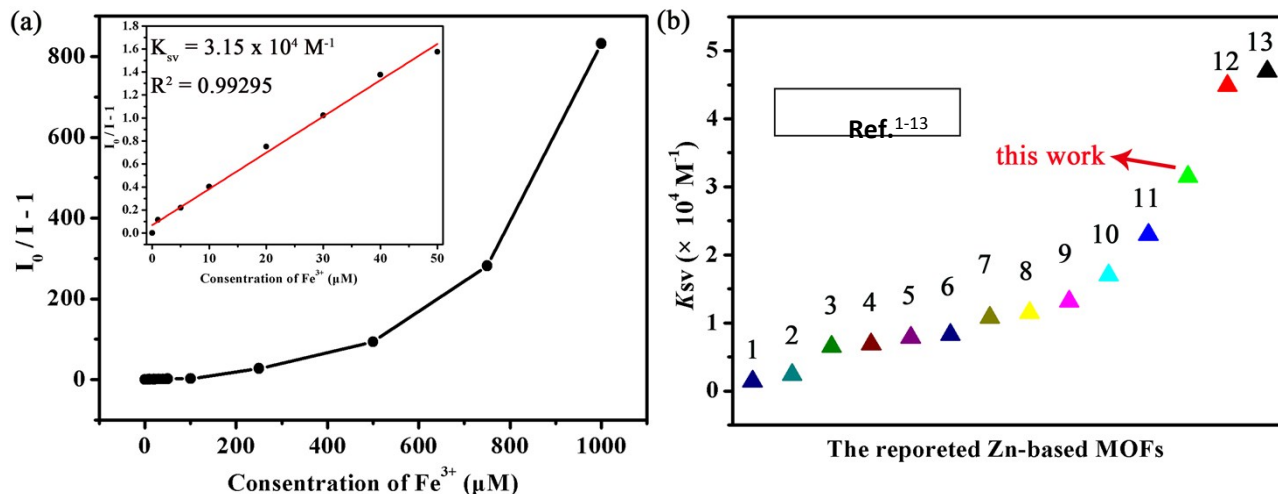

**Fig. S19** (a) Stern–Volmer plot of  $I_0/I$  versus  $Fe^{3+}$  concentration in DMF suspension for **3** (inset: the linear relationship between  $I_0/I$  and low concentration of  $Fe^{3+}$  ions). (b) The comparison of  $K_{sv}$  values between Zn-based MOFs reported and our work for sensing  $Fe^{3+}$  ions.

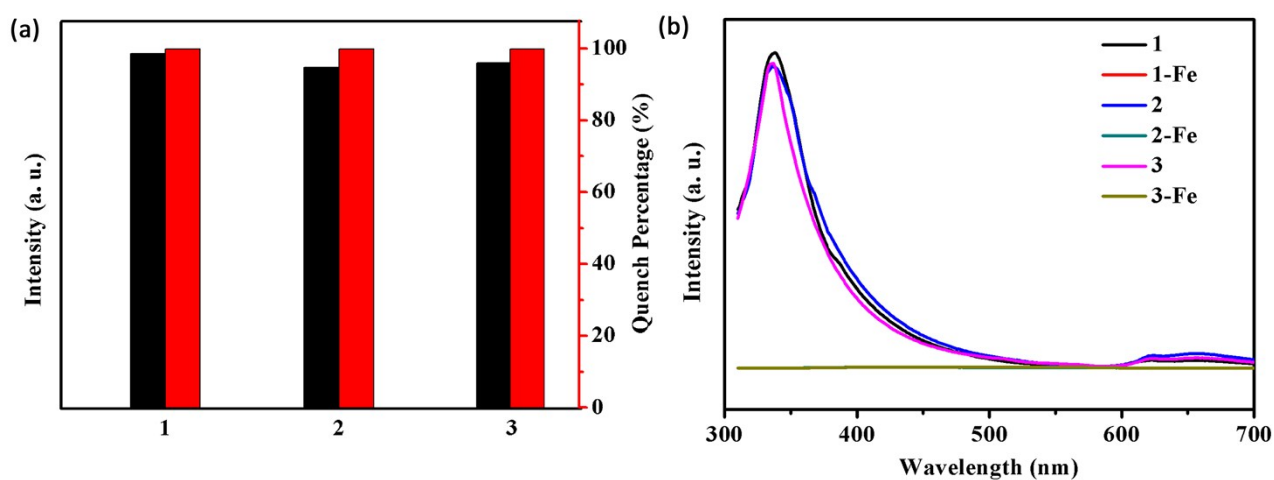

**Fig. S20** (a) Recycle tests of complex **3** by the monitoring of the luminescence intensity at 335 nm and the luminescence quenching percentage before (black) and after (red) adding of  $Fe^{3+}$  ions (1 mmol  $L^{-1}$ ). (b) Luminescence spectra of suspensions the DMF suspensions of complex **3** after adding 1mmol  $L^{-1}$   $Fe^{3+}$  ions solutions from the first to third cycles in the recycle tests.

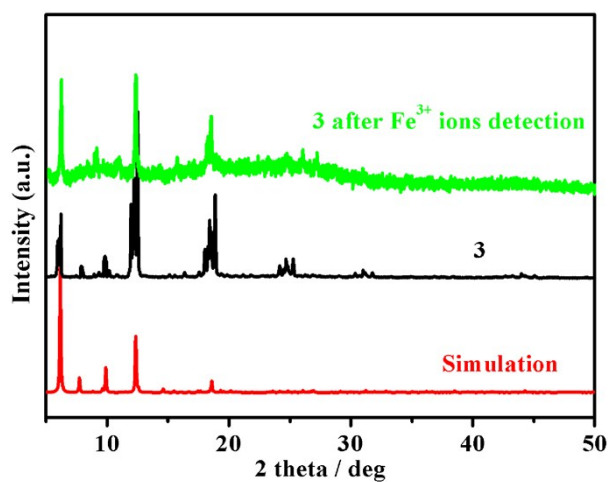

**Fig. S21** PXR D patterns of simulated and complex **3** before and after three cycles toward the detection of Fe<sup>3+</sup> ions.

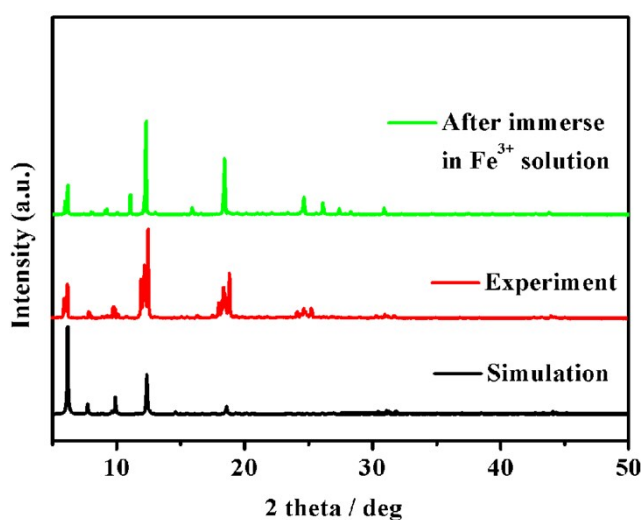

**Fig. S22** The patterns simulated for compound **3**, and PXR D patterns of compound **3** as-synthesized and immersed in Fe<sup>3+</sup> DMF solution at room temperature.

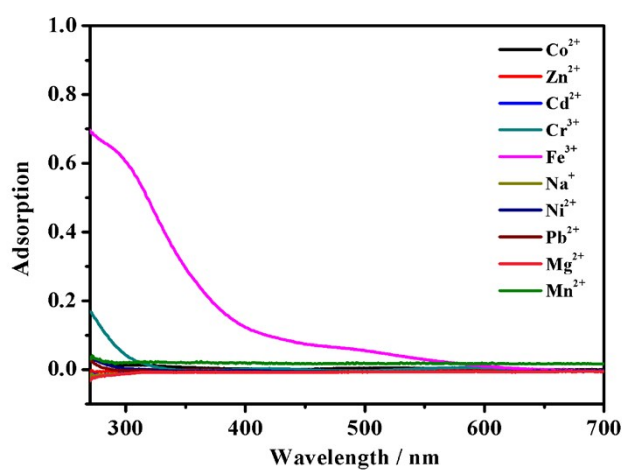

**Fig. S23** UV-Vis spectra of different metal ions with the same concentration (0.2 mmol L<sup>-1</sup>).

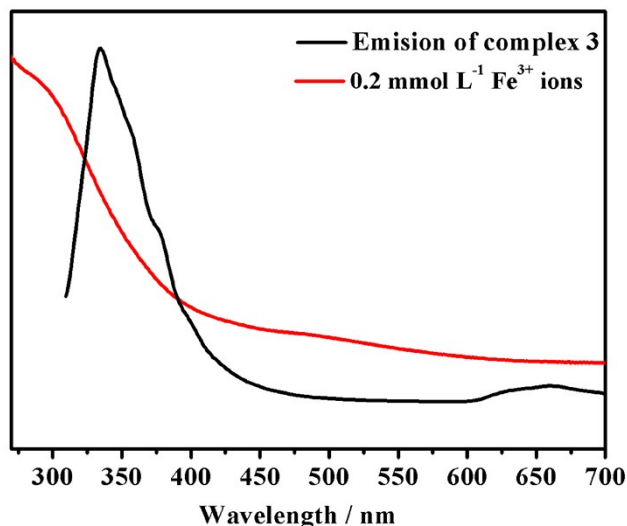

**Fig. S24** UV-Vis spectra of  $\text{Fe}^{3+}$  ions DMF solutions ( $0.2 \text{ mmol L}^{-1}$ ) and emission spectrum of complex **3**.

## References

1. P. Hao, Q. Huang, L. Gu, Y.-H. Yu and D.-S. Ma, *Polyhedron*, 2018, **149**, 117-125.
2. F. L. Hu, Y. X. Shi, H. H. Chen and J. P. Lang, *Dalton Trans.*, 2015, **44**, 18795-18803.
3. Y. Q. Zhang, V. A. Blatov, T. R. Zheng, C. H. Yang, L. L. Qian, K. Li, B. L. Li and B. Wu, *Dalton Trans.*, 2018, **47**, 6189-6198.
4. M. Arici, *Cryst. Growth Des.*, 2017, **17**, 5499-5505.
5. J.-C. Jin, J. Wu, Y.-X. He, B.-H. Li, J.-Q. Liu, R. Prasad, A. Kumar and S. R. Batten, *CrystEngComm.*, 2017, **19**, 6464-6472.
6. C. H. Chen, X. S. Wang, L. Li, Y. B. Huang and R. Cao, *Dalton Trans.*, 2018, **47**, 3452-3458.
7. Y. Jiang, L. Sun, J. Du, Y. Liu, H. Shi, Z. Liang and J. Li, *Cryst. Growth Des.*, 2017, **17**, 2090-2096.
8. M.-Y. Sun and D.-M. Chen, *Polyhedron*, 2018, **147**, 80-85.
9. Z. J. Wang, F. Y. Ge, G. H. Sun and H. G. Zheng, *Dalton Trans.*, 2018, **47**, 8257-8263.
10. Z. F. Wu and X. Y. Huang, *Dalton Trans.*, 2017, **46**, 12597-12604.
11. J.-L. Du, X.-Y. Zhang, C.-P. Li, J.-P. Gao, J.-X. Hou, X. Jing, Y.-J. Mu and L.-J. Li, *Sensors and Actuators B*, 2018, **257**, 207-213.
12. J.-C. Jin, X.-R. Wu, Z.-D. Luo, F.-Y. Deng, J.-Q. Liu, A. Singh and A. Kumar, *CrystEngComm.*, 2017, **19**, 4368-4377.
13. Y. T. Yan, W. Y. Zhang, F. Zhang, F. Cao, R. F. Yang, Y. Y. Wang and L. Hou, *Dalton Trans.*, 2018, **47**, 1682-1692.
